1 Share, but unequally: A plausible mechanism for  
2 emergence and maintenance of intratumor  
3 heterogeneity

4 Xin Li\*<sup>1</sup> and D. Thirumalai<sup>†1</sup>

5 <sup>1</sup>Department of Chemistry, University of Texas at Austin, Texas  
6 78712, USA

7 November 8, 2018

8 **Abstract**

9 Intratumor heterogeneity (ITH), referring to coexistence of different cell sub-  
10 populations in a single tumor, has been a major puzzle in cancer research for  
11 almost half a century. The lack of understanding of the underlying mechanism of  
12 ITH hinders progress in developing effective therapies for cancers. Based on the  
13 findings in a recent quantitative experiment on pancreatic cancer, we developed  
14 a general evolutionary model for one type of cancer, accounting for interactions  
15 between different cell populations through paracrine or juxtacrine factors. We  
16 show that the emergence of a stable heterogeneous state in a tumor requires an  
17 unequal allocation of paracrine growth factors (“public goods”) between cells  
18 that produce them and those that merely consume them. Our model provides  
19 a quantitative explanation of recent *in vitro* experimental studies in pancreatic  
20 cancer in which insulin growth factor (IGF-II) plays the role of public goods.  
21 The calculated phase diagrams as a function of exogenous resources and fraction  
22 of growth factor producing cells show ITH persists only in a narrow range of  
23 concentration of exogenous IGF-II. Remarkably, maintenance of ITH requires  
24 cooperation among tumor cell subpopulations in harsh conditions, specified by  
25 lack of exogenous IGF-II, whereas surplus exogenous IGF-II elicits competition.  
26 Our theory also quantitatively accounts for measured *in vivo* tumor growth in  
27 glioblastoma multiforme (GBM). The predictions for GBM tumor growth as a  
28 function of the fraction of tumor cells are amenable to experimental tests. The  
29 mechanism for ITH also provides hints for devising efficacious therapies.

30  
31 **Keywords:** Intratumor heterogeneity, evolution, public goods, allocation  
32 strategy, cooperation, competition.

---

\*xinlee0@gmail.com

†dave.thirumalai@gmail.com

## 33 Introduction

34 Cancer, a complex disease that arises through clonal evolution, is a major cause  
35 of mortality throughout the world with no cure in sight despite a tremendous  
36 amount of effort and resources expended to uncover its root causes. The un-  
37 derlying mechanisms of the origin and spread of cancer is still under debate [1].  
38 The first evolutionary theory of cancer, proposed by Nowell in 1976, describes  
39 cancer progression as a linear process derived from sequential acquisition of so-  
40 matic mutations [2]. With the advent of next generation sequencing [3] it has  
41 become clear that instead of linear growth cancer evolution is better described  
42 by branched growth in which multiple subclones appear and coexist during  
43 cancer progression. Accumulating evidence favor the branched model and the  
44 associated intratumor heterogeneity (ITH) [4, 5, 6, 7, 8, 9, 10, 11]. ITH is a  
45 complex phenomenon and many sources, such as genetic, epigenetic mutations,  
46 stochastic genetic expression and so on, could contribute to its origin [12]. The  
47 presence of ITH in a variety of cancers, which is a great impediment in de-  
48 signing effective treatments [12, 13, 14], is hard to rationalize according to the  
49 linear evolutionary model because subclones with even a small fitness advan-  
50 tage should ultimately proliferate at the expenses of others. For this reason the  
51 persistence of ITH in a macroscopic tumor is a puzzle.

52 The tumor cells, with diverse genetic or epigenetic mutations, are often spa-  
53 tially separated [4, 7] with each subclone dominating the cell population in a spe-  
54 cific region. It indicates that spatial constraints or distinct microenvironments  
55 might prohibit clonal sweeps, thus inducing ITH. However, it cannot explain  
56 the coexistence of distinct subclones in the same region of a tumor [15, 16].

57 The interactions between tumor cells and the surrounding normal cells, and  
58 microenvironments have been extensively studied in the past few decades [17,  
59 18, 19, 20] while much less effort has been made in investigating the inter-  
60 actions among subclonal populations in tumors. Instead of competition, the  
61 cooperation among distinct subclonal populations is found to be essential for  
62 tumor maintenance [21], enhance tumor growth [22], and even facilitate cancer  
63 metastasis [23, 24]. Meanwhile, it is observed that a minor and even unde-  
64 tectable subclone can dominate the clinical course and lead to cancer relapse  
65 frequently [25, 26, 27]. Therefore, it is crucial to understand the mechanism of  
66 cooperation that facilitates the emergence and maintenance of ITH in a single  
67 tumor.

68 Cooperation can be established through mutualism or even unidirectional  
69 interactions among different subpopulations. Mutualism in ecology provides an  
70 effective mechanism for the establishment of a heterogeneous state in which each  
71 subpopulation benefits from the activity of the other [28, 29, 30, 31]. Recently,  
72 it was found that two distinct subclones in cancer can complement each other's  
73 deficiency in order to survive and proliferate [21]. The formation of a hetero-  
74 geneous state can be explained by a mechanism similar to mutualism in which  
75 fitness of distinct cell types is maximized by resource sharing [32]. Compared to  
76 the strict interdependence in mutualism, a unidirectional interaction between  
77 distinct populations is observed more frequently [32, 33, 34]. It is quite common

78 to find that some tumor cells secrete diffusible growth factors or other paracrine  
79 factors to promote tumor growth [32]. Meanwhile, other types of tumor cells  
80 free ride on those essential nutrients to grow and might even dominate the whole  
81 population without producing them. One recent study for Glioblastoma multi-  
82 forme (GBM) shows that a minor subclone in a tumor supports and promotes  
83 the growth of a dominant one by activating a paracrine signaling circuit [34].  
84 It was found that the mixture of these two distinct subpopulations promote  
85 faster tumor growth than they would by themselves. Similarly, an insightful *in*  
86 *vitro* experiment combined with theoretical analysis based on evolutionary game  
87 theory [35] investigated the “public goods game” in pancreatic cancer cell pop-  
88 ulations in which one cell type produces a growth factor as the “public good”.  
89 The growth factors promote the proliferation of both cell types. It is found that  
90 these two types of cancer cells can coexist under certain conditions although  
91 there is only a unidirectional interaction between them. Although insightful,  
92 previous applications of the evolutionary game theory provided only a quali-  
93 tative explanation for the experimental results [35]. The assumption that the  
94 population size is a constant does not accurately capture the growth dynamics  
95 observed in their experiments. In addition, as shown here, such an assumption  
96 cannot account for the intriguing related phenomena of glioblastoma multiform  
97 growth [34] in which there are clear manifestations of ITH. Additionally, a theo-  
98 retical framework accounting for influences of different factors such as exogenous  
99 resources and the cost for producing public goods on the establishment of coop-  
100 eration between two cell populations directly is needed for expanding the scope  
101 of the game theory applications. Therefore, the underlying generality of the  
102 mechanisms for the origin of ITH is still unclear.

103 Here, we investigate the mechanism of cooperation between two distinct  
104 populations composed of ‘producers’ and ‘non-producers’. We show that sev-  
105 eral factors are indispensable for the maintenance of a stable heterogeneous  
106 coexisting population of producer and non-producer cells. A critical finding in  
107 our work is that the unequal allocation of public goods among different species  
108 plays a crucial role in maintaining heterogeneity. By studying the influence of  
109 exogenous resources and initial population fraction on such a simple system,  
110 we obtained a phase diagram from our theory, which is in excellent agreement  
111 with experimental observations. Our theory also quantitatively explains the un-  
112 expected growth behaviors of GBM tumors as a function of initial fractions of  
113 producer cells in *in vivo* experiments with no free parameters. The robustness  
114 of the theory is established by making testable predictions of the origin of ITH  
115 in GBM driven by a paracrine mechanism [34]. The discovery of mechanisms  
116 for such ITH might also give clues for changing strategy of treatment in cancers  
117 in which interactions between different subclones are prevalent.

## 118 Models

119 The public goods game has been extensively used in the studies of human soci-  
120 eties, and similar concepts have been applied to other systems, such as microbial

121 colonies, and insect communities [36, 37, 38, 39, 40, 41]. In this model, both  
122 the producer and non-producer benefit from the products produced solely by  
123 the former (see Fig. 1). However, the producers pay a price for the produc-  
124 tion of public goods while the non-producers merely free-ride on the products  
125 without incurring any cost. In general, such a dynamics would result in an  
126 unstable system in the sense the producer might become extinct if the public  
127 goods are shared equally between the parties. The system would collapse unless  
128 sufficient exogenous resources are provided, which could lead to the fixation of  
129 non-producers, as discussed below in detail.

130 **Equal sharing is untenable:** We describe the evolution of the fraction  $f_+$   
131 of producers and  $f_-$  of non-producers using the replicator equations,

$$\frac{\partial f_+}{\partial t} = (w_+ - \langle w \rangle) f_+, \quad (1)$$

132 and,

$$\frac{\partial f_-}{\partial t} = (w_- - \langle w \rangle) f_-, \quad (2)$$

133 where  $w_+$  and  $w_-$  are fitness of producers, and non-producers, respectively. The  
134 normalization condition is  $f_+ + f_- = 1$ . The average fitness  $\langle w \rangle$  is,

$$\langle w \rangle = w_+ f_+ + w_- f_-. \quad (3)$$

135 Let  $N_+$ , and  $N_-$  be the number of producers and non-producers, respectively.  
136 The total population size is  $N \equiv N_+ + N_-$ . Although the system size,  $N$ , is  
137 often assumed to be a constant [35, 42], we consider a general case [43] where  
138 the population size varies with the time evolution given by,

$$\frac{\partial N}{\partial t} = w_+ N_+ + w_- N_- = \langle w \rangle N. \quad (4)$$

139 Agent death, neglected for simplicity, could be readily included in the fitness  
140 functions.

141 If the public goods are shared among all the producers and non-producers  
142 equally, the same benefit will be presented to them, leading to the relation,

$$w_+ = w_- - p_0, \quad (5)$$

143 where  $p_0$  ( $> 0$ ) is the cost paid by the producers to generate the public goods.  
144 Then, the time evolution of producers could be rewritten as,

$$\frac{\partial f_+}{\partial t} = -p_0 f_+ (1 - f_+). \quad (6)$$

145 Therefore, the fraction of producers would decrease with time until it vanishes  
146 because  $p_0$ ,  $f_+$ , and  $1 - f_+$  are all non-negative. Then, the non-producers could  
147 sweep through the population, achieving higher fitness in the process, if exoge-  
148 nous public goods are provided continuously to support the population growth.  
149 Otherwise, the system would collapse as observed in the case of “tragedy of the  
150 commons” once the public goods are depleted [44].

## 151 Results

152 **Coexistence between producers and non-producers requires non-linear**  
153 **fitness:** A solution to the dilemma that emerges from the naive model of equal  
154 sharing, discussed above, is to change the rule for the allocation of public goods.  
155 Because the producer pays a price for the production of public goods, which de-  
156 creases its fitness directly, more products should be allocated to the producer  
157 (see the public goods distribution in Fig. 1A as an example). If this were to oc-  
158 cur the producer would recoup the losses in order to gain the same fitness as the  
159 non-producer. In this unequal sharing scenario, the producer and non-producer  
160 could coexist, as we show here.

161 In general, the fitness of one agent is a function of the fraction of produc-  
162 ers. A higher fitness is expected as the fraction of producers increases. For  
163 a dynamic system, a heterogeneous state (containing both producers and non-  
164 producers) could be maintained only the stabilities of the states are ensured. A  
165 heterogeneous state cannot be realized if  $w_+$  and  $w_-$  are linear fitness functions  
166 of  $f_+$ . Let the fitness functions of the producer ( $w_+$ ) and non-producer ( $w_-$ )  
167 be,

$$w_+ = k_+ f_+ - p_0, \quad (7)$$

168 and

$$w_- = k_- f_+, \quad (8)$$

169 respectively. The parameters  $k_+$ ,  $k_-$  are the corresponding allocation coeffi-  
170 cients of public goods produced by producers and  $p_0$  is the cost paid by each  
171 producer. The producer needs to get more public goods than the non-producer,  
172 which means  $k_+ > k_-$  ( $k_+ = k_-$  in Eq. (5)). The condition for equilibrium with  
173 both players follows from Eqs. (1) and (2), resulting in,

$$f_+^0 = \frac{p_0}{k_+ - k_-}. \quad (9)$$

174 Given the fraction  $f_+^0$  for the producer in Eq. (9), the two members attain the  
175 same fitness ( $w_+ = w_-$ ). However, this equilibrium is unstable and eventually  
176 only one of them survives (see Fig. S1 in the SI). As the fraction  $f_+$  becomes  
177 a little higher than  $f_+^0$  due to the birth of new producers or a higher value is  
178 given initially, the producer would attain higher fitness than the non-producer  
179 (for  $k_+ > k_-$ ), leading to a much higher fraction of the producer. Finally, the  
180 producer would take over the whole population due to this positive feedback. In  
181 the opposite limit, the system would consist of non-producer only if  $f_+$  is smaller  
182 than  $f_+^0$ . Therefore, a linear fitness function cannot lead to the establishment of  
183 a stable heterogeneous system in the present model. Instead of a linear function,  
184 fitness functions are typically non-linear in biological systems at all length scales  
185 due to cooperation or competition between the various interacting moieties [45,  
186 46, 47, 48]. In the following, we first utilize data from one recent experiment  
187 to illustrate how a stable heterogeneous population can be established from the  
188 public goods game in a system consisting of both producers and non-producers  
189 where a non-linear relation is observed for fitness functions [35].

190 In a recent study, Archetti, Ferraro and Christofori (AFC) investigated the  
191 origin of the “tragedy of the commons” in cancer cells [35]. The insulin-like  
192 growth factor II (IGF-II) is up-regulated in many cancers, which can promote  
193 cell proliferation and abrogate apoptosis [49, 50]. The producer (+/+) cells are  
194 derived from mice with insulinomas (a neuroendocrine pancreatic cancer), while  
195 the non-producer (-/-) cells are obtained from the same mice but with IGF-II  
196 gene deleted. Therefore, the -/- cells do not produce the IGF-II molecules.  
197 Thus, IGF-II is an ideal public good for these two cell types because both of  
198 them can uptake this protein to reach higher fitness (growth rate), ensuring  
199 their survival and growth. The two different types of cells were then mixed to  
200 investigate the conditions under which a stable heterogeneous state could be  
201 established, mediated by optimal sharing of IGF-II. Although AFC proposed  
202 a sound analyses of their findings based on game theory, only qualitative com-  
203 parisons to their experiments were provided. In addition, the assumption of  
204 a constant population size [51] also requires scrutiny. Here we approach the  
205 problem from a different perspective relying on the replicator dynamics with  
206 evolving population size, which enables us to make quantitative predictions not  
207 only for pancreatic cancer but also GBM.

208 The measured growth rate of the non-producer -/- cells as a function of  
209 exogenous IGF-II concentration,  $c$ , is non-linear (see Fig. S2 in the SI). In order  
210 to solve the replicator equations, we first fit the experimentally measured -/-  
211 cell growth rate using a Hill-like function,

$$w_- = a_1 + \lambda_1 c^\alpha / (a_2^\alpha + c^\alpha). \quad (10)$$

212 The Hill function in Eq. (10) fits the experimental data accurately (see Fig. S2  
213 in the SI) yielding  $a_1 = 2.0$ ,  $\lambda_1 = 18.9$ ,  $\alpha = 0.7$ , and  $a_2 = 3.2$ . We also used the  
214 logistic function, which does not fit the data nearly as well, to make predictions  
215 (see Figs. S3, S4 and SI for details). Interestingly, the use of logistic function  
216 for the fitness yields qualitatively similar results (see Figs. S3, S4 and the SI  
217 for details), thus demonstrating that non-linear feedback between +/+ and -/-  
218 cells is the source of heterogeneity, as already surmised by AFC. We describe  
219 the results in the rest of the paper using the Hill-like function for  $w_+$  and  $w_-$ .

220 The public good IGF-II is produced endogenously or can be supplied ex-  
221 ogenously. Therefore, we write the IGF-II ( $c_-$ ) available for the non-producer  
222 as,

$$c_- \equiv c = bf_+ + c_0. \quad (11)$$

223 where  $c_0$  represents the exogenous supply of IGF-II, and  $bf_+$  is the allocation  
224 of IGF-II arising from +/+ cells. Because AFC did not measure the fitness of  
225 the producer cells systematically, a relation similar to that in Eq. (10) for  $w_+$ ,  
226 might be assumed. In order for the emergence of heterogeneous populations,  
227 the allocation of public goods produced by the +/+ cells should be unequal, so  
228 the growth rate of +/+ cells is written as,

$$w_+ = g(c_+) - p_0, \quad (12)$$

229 where  $g(c_+)$  has the same Hill-like functional form as in Eq. (10) except that  $c$   
230 is replaced by  $c_+$ , leading to,

$$c_+ = af_+ + c_0. \quad (13)$$

231 The parameter  $a$ , similar to  $b$  in Eq. (11), is the coefficient for the allocation of  
232 IGF-II produced by  $+/+$  cells.

233 **Influence of public goods allocation strategies:** First, let us consider  
234 the influence of allocation strategies for public goods in a mixture of  $+/+$  and  
235  $-/-$  cells. The ratio of  $b/a$  in Eqs. (11) and (13) determine how the public goods  
236 provided by the producers are shared between the two populations. The public  
237 goods are shared equally if the ratio ( $b/a$ ) is equal to unity, while the producers  
238 do not provide resources to the non-producer if  $b/a = 0$ . More resources are  
239 allocated to the producer if  $b/a < 1$  while the non-producer obtains a larger  
240 amount of resources as  $b/a > 1$ . Public goods (IGF-II) is diffusible, which is  
241 modeled in our theory in the following way. The equality ( $a = b$ ) would result if  
242 diffusion of IGF-II is rapid. On the other hand, the inequality,  $a > b$ , would be  
243 a consequence of slow diffusion or fast uptake of IGF-II by the producers. The  
244 assumption of slow diffusion, with a limited diffusion range of IGF-II, is made  
245 in the model of AFC [35]. Thus, by considering different values of the ratio,  $b/a$ ,  
246 different rates of diffusion and uptake of IGF-II are covered. Accordingly, three  
247 values 1, 0, and 0.1 are considered for the ratio  $b/a$  in Figs. 2A-C, which show  
248 the growth rate of the two cell types as a function of the fraction ( $f_+$ ) of  $+/+$   
249 cells. The corresponding evolution of  $f_+(t)$  under different initial conditions are  
250 also shown in Figs. 2D-F.

251 The  $-/-$  cells always grow faster than  $+/+$  cells if the public goods are shared  
252 equally ( $b/a = 1$ ) (see Fig. 2A), which can also be derived from Eqs. (10) and  
253 (12) directly ( $w_- > w_+$  for  $b \geq a$ ). The non-producer always attains higher  
254 fitness than the producer as long as the former gets larger ( $b/a > 1$ ) or equal  
255 ( $b/a = 1$ ) amount of IGF-II. Therefore, the non-producer would take over the  
256 whole population if  $b/a \geq 1$  producing a homogeneous state, irrespective of the  
257 initial fraction  $f_+(0)$  of the producer (see the evolution of  $f_+(t)$  in Fig. 2D).  
258 The exception is when  $f_+(0) = 1$ . The state with producers only ( $f_+ = 1$ , see  
259 the open circle in Fig. 2A) is unstable under infinitesimal perturbations of non-  
260 producer population. A steady binary system with the coexisting population of  
261  $+/+$  and  $-/-$  cells cannot form under these conditions, as expected from previous  
262 arguments.

263 Consider another limiting case with  $b/a = 0$  in which the non-producer does  
264 not get access to the public goods generated by the producer (with  $w_- = \text{constant}$ , see the dash-dotted blue line in Fig. 2B). In this limit, it is possible to  
265 have an internal equilibrium (see the open circle in Fig. 2B) resulting in the two  
266 cells having the same fitness ( $w_- = w_+$ ). However, this is an unstable equi-  
267 librium state, which means only one type of population would survive (see the  
268 filled red and blue circles in Fig. 2B, respectively) depending on the initial con-  
269 ditions (see also the evolution of  $f_+(t)$  in Fig. 2E). A stable homogeneous state  
270 consisting of only producers results if  $f_+(0)$  is above the fraction ( $f_+^{us}$ ) of the  
271



272 producer corresponding to the internal unstable state (illustrated by the open  
273 circle in Fig. 2B). In this case, the flow is towards the  $f_+(0) = 1$  stable state.  
274 For  $f < f_+^{us}$ , the non-producers form another stable homogeneous state (see  
275 the green dotted and blue dash-dotted lines in Fig. 2E). A stable heterogeneous  
276 state with coexisting populations cannot exist if  $b/a = 0$ .

277 If the public goods are allocated unequally between the  $+/+$  and  $-/-$  cells due  
278 to the presence of spatial structure, (Fig. 2C) with  $0 < b/a < 1$ , two internal  
279 equilibrium states (with  $0 < f_+^i < 1$ ) appear. One of them is an unstable  
280 state (the left open circle in Fig. 2C) whereas the filled green circle in Fig. 2C  
281 corresponds to a stable state due to the frequency-dependent selection [35, 52].  
282 Close to the internal stable state, the fitness of  $+/+$  cells becomes smaller  
283 than that of  $-/-$  cells as the  $+/+$  cell frequency increases above the stable state  
284 value. Therefore, the frequency of  $+/+$  ( $-/-$ ) cells will decrease (increase) until  
285 it returns to the value corresponding to the stable state (see the yellow dashed  
286 lines in Fig. 2F). Similar effect is observed when the  $+/+$  cell frequency is  
287 below the stable state value (see the green dotted lines in Fig. 2F) as long as  
288 the  $f_+(0)$  is higher than the value  $f_+^{us} = 0.069$  corresponding to the internal  
289 unstable state. Therefore, the two types of cells coexist, leading to a stable  
290 heterogeneous state. We also observe that producers would be extinct (see the  
291 blue dash-dotted line in Fig. 2F) if a small amount of  $+/+$  cells are mixed with  
292 a large population of  $-/-$  cells initially. These findings based on the replicator  
293 equations with non-linear  $w_-$  are consistent with the experimental observations  
294 obtained in the presence of a small amount of exogenous resources [35].

295 **Role of the exogenous production of public goods:** From Eq. (11), it  
296 is clear that the stable state could also be influenced by extrinsic factors, such  
297 as the supply of exogenous resources. By varying the values of the parameter  $c_0$   
298 in Eqs. (11) and (13), we investigated the role of exogenous resources in public  
299 goods game. The growth rate of the two different types of cells as a function of  
300 the fraction of  $+/+$  cells is shown in Fig. 3 as the supply of exogenous resources  
301 (serum in the experiments [35] containing IGF-II molecules) is changed.

302 Fig. 3A shows that  $-/-$  cells grow faster than  $+/+$  cells irrespective of the  
303 fraction  $f_+$  of  $+/+$  cells given large enough exogenous public goods (large  $c_0$ ).  
304 Surprisingly, we find that the non-producer would sweep through the population  
305 while the producer becomes extinct (see the blue filled circle in Fig. 3A) even  
306 though the latter could get additional public goods produced by themselves  
307 ( $b/a \ll 1$ ). This is due to the competitive advantage of the non-producers in  
308 a high welfare environment without punishment. These two cell types compete  
309 but do not cooperate with each other in nutrient-abundant environments.

310 As we decrease the serum concentration (smaller  $c_0$ ) and keep all other  
311 parameters the same as in Fig. 3A, the two cell types start to establish a coop-  
312 erative relationship and could coexist (see Fig. 3B). It leads to the appearance  
313 of a stable heterogeneous state (see the green filled circle in Fig. 3B), indicat-  
314 ing that cooperation could be established more readily under harsh conditions  
315 (small available exogenous resources). In addition, the whole system could at-  
316 tain higher fitness or drug resistance (see more detailed discussions later) due to  
317 the coexistence of both the players. It is well known that many cancer cells have



318 to confront hypoxia, low pH, low glucose and other severe conditions [53, 54],  
319 and they are often found to be more aggressive and dangerous compared to can-  
320 cer cells under normal growth conditions with access to essential nutrients [55].  
321 These conditions might make it favorable to establish cooperation among them,  
322 leading to the formation of heterogeneous populations.

323 If exogenous resources removed from the system completely ( $c_0 = 0$ ), the  
324 +/+ cells dominate the whole population while the -/- cells would be swept away  
325 (see the red filled circle in Fig. 3C) at sufficiently high  $f_+(0)$ . In the opposite  
326 limit ( $f_+(0)$  is small), the -/- cells can take over the whole population (see the  
327 blue filled circle in Fig. 3C). The phenomenon of tragedy of the commons will  
328 be observed if the public goods are essential for the survival of non-producers.  
329 Taken together these results show that the establishment of cooperation between  
330 different players shows strong dependence on environmental conditions. The  
331 influences of exogenous public goods as observed in Fig. 3 are consistent with  
332 the experimental results [35], and are further discussed below.

333 **Comparison with *in vitro* experiments:** Based on the calculations pre-  
334 sented so far, we can now obtain the internal equilibrium fractions ( $f_+^i$ ) of +/+  
335 cells at different concentrations of serum. The experimental observations for  
336  $f_+^i$  are given by symbols in the upper panel of Fig. 4. The fractions  $f_+^s$  ( $f_+^{us}$ )  
337 under stable (unstable) internal state are represented by red squares (blue cir-  
338 cles). From experimental result (Fig. 1A) in [35] for the equal fitness ( $\approx 14.4$ )  
339 of producer and non-producer cells and the fraction of +/+ cells approaching 1  
340 for the stable internal state at  $c_0 = 0$ , we obtain the parameter  $b \approx 8$ . Our the-  
341 oretical model with two free parameters  $a$  and  $p_0$  fits the experimental results  
342 very well (see the solid red and blue lines in the upper panel of Fig. 4). One  
343 scale parameter has been used with  $c_0 = 1, 2, \dots$  corresponding to 3%, 6%, ... of  
344 serum.

345 To illustrate the stability of the internal equilibrium state, an example is  
346 given in the lower panel of Fig. 4, which describes the evolution of the fraction  
347 of +/+ cells under different initial conditions ( $f_+(0)$ ). The serum amount is  
348 fixed at 3%. It shows clearly that a stable equilibrium state is attained as long  
349 as  $f_+(0)$  is above  $f_+^{us}$ , corresponding to the unstable internal equilibrium state.  
350 Then, the two types of cells cooperate leading to coexistence. However, the  
351 +/+ cells could be swept out and only -/- cells exist if  $f_+(0)$  is below  $f_+^{us}$  (see  
352 the dotted line in the inset of the lower panel of Fig. 4). From the results in the  
353 upper panel of Fig. 4, it follows that there exists a critical concentration  $c_0^c$  for  
354 exogenous resources (around 7% of serum in the experiment [35]). A bistable  
355 system can be reached only if the concentration of serum is lower than  $c_0^c$ . One  
356 stable state corresponds to a heterogeneous system with two subpopulations and  
357 the other one is a homogeneous state consisting of only -/- cells (see Fig. 3B). In  
358 this scenario, maintenance of heterogeneous state is due to cooperation between  
359 +/+ and -/- cells. In contrast, as the concentration of serum increases beyond  
360  $c_0^c$ , the -/- cells can always obtain sufficient resources to support a faster growth  
361 rate than +/+ cells (see Fig. 3A). Then, the -/- cell would sweep through the  
362 whole population as long as its initial fraction is non-zero. Therefore, compe-  
363 tition rather than cooperation is promoted between cell subpopulations under

364 resource-abundant conditions. It eventually leads to the establishment of a ho-  
365 mogeneous system with only a single type of cell population.

366 **Effects of price paid by producers:** In previous sections, we established  
367 that supply and allocation of public goods play crucial roles in determining  
368 the interactions among subpopulations. We investigate the influence of another  
369 parameter  $p_0$ , the price paid by +/+ cells to produce the public goods, which  
370 in the AFC experiment is IGF-II. The fitness of producers is affected by this  
371 parameter directly (see Eq. (12)), so we anticipate that it will influence the  
372 relationship between producers and non-producers.

373 Just as in Fig. 4, we investigated the internal equilibrium fraction  $f_+^i$  of pro-  
374 ducers as a function of the level of exogenous resources but differing values of  $p_0$ .  
375 The stable internal equilibrium fraction of producers is represented by the red  
376 curves while the blue curves report the unstable internal equilibrium fraction  
377 (Fig. 5A). A critical  $p_0$ -dependent concentration for exogenous resources is ob-  
378 served in Fig. 4 above which non-producers can maintain a stable homogeneous  
379 system irrespective of the fate of the producers. The value of the critical con-  
380 centration (see the red arrows in Fig. 5A) increases as  $p_0$  decreases. The fitness  
381 of producers increases as they pay a much lower price (smaller  $p_0$ ) for public  
382 goods production. Therefore, additional exogenous resources have to be pro-  
383 vided to enhance the competitive advantage of non-producers at small  $p_0$ . We  
384 also observed another critical value (indicated by the star symbols in Fig. 5A)  
385 for exogenous resources at relatively small  $p_0$  values. Only stable homogeneous  
386 states (consisting of either producers or non-producers) exist if the level of ex-  
387 ogenous resources fall below this critical value. Interestingly, it becomes easier  
388 for the producer to establish a stable homogeneous system as  $p_0$  decreases. On  
389 the other hand, only a small increase of exogenous resources leads to a homoge-  
390 neous tumor consisting of only non-producers, as  $p_0$  takes on large values (see  
391 the dotted line in Fig. 5A).

392 From Fig. 5A, we obtain the phase diagram in terms of the variables of the  
393 exogenous public goods concentration, and the initial fraction  $f_+(0)$  of produc-  
394 ers. Two examples, shown in Figs. 5B and 5C with  $p_0 = 4.65$ , and  $p_0 = 4.0$ ,  
395 respectively, show the emergence of three stable phases. At low levels of ex-  
396 ogenous resources and large  $f_+(0)$ , a homogeneous phase with only producers  
397 (shown in pink color) exists. The second homogeneous phase, with only non-  
398 producers (shown in blue color), is easily accessible at high levels of exogenous  
399 resources. A heterogeneous phase representing the coexistence of both producer  
400 and non-producer cells (purple color) can be attained at intermediate levels of  
401 exogenous resources and large  $f_+(0)$ . By comparing Figs. 5B and 5C, we find  
402 that the parameter space for the non-producer to take over the whole system  
403 shrinks as  $p_0$  decreases while it increases for the producer to dominate the sys-  
404 tem. These figures also show that a heterogeneous system might be established  
405 easily (within a larger parameter space, comparing the purple region in Figs. 5B  
406 and 5C) if the producer pays a relatively high price for public goods production.  
407 From these discussions, we conclude that the price  $p_0$  paid by producers greatly  
408 influences the state of the tumor, especially the robustness of the heterogeneous  
409 state. It appears that one can design better treatment protocols for cancers

410 composed of different subpopulations by regulation of certain parameters, such  
411 as  $p_0$  discussed here.

412 **Cooperation among cancer subpopulations in *in vivo* experiments**  
413 **on glioblastoma:** The mechanism of cooperation and feedback described through  
414 the replicator equations might be operative in other cancers. In order to illus-  
415 trate the applicability of our theory, we analyze the origin of ITH in Glioblas-  
416 toma multiforme (GBM). It is known that GBM is the most common and ag-  
417 gressive primary brain cancer with poor prognosis. The five-year survival rate is  
418 less than five percent, and most patients live for only a year following diagnosis  
419 and treatment [56]. The extensive presence of ITH in GBM is well-known at  
420 the genetic, molecular and cellular levels [57, 58]. As in many other types of  
421 cancers, the mechanism for the origin of heterogeneity in GBM remains unclear,  
422 which is one reason in the poor design of effective treatment.

423 It is established [59, 60, 61] that chromosomal amplification of epidermal  
424 growth factor receptor gene (EGFR) is present in most cells of many primary  
425 GBMs. Another type of cell, showing intragenic rearrangement of EGFR gene  
426 (with deletion of exons 2-7) also frequently appear in the same tumor [62]. The  
427 coexistence of these two types of cells with differing expressions of the growth  
428 factor receptor leads to a worse prognosis of GBM [63, 64] than would be the  
429 case when the cell (with EGFR gene rearrangement) is absent.

430 Recently, an experiment [34] studied the interactions between tumor cells  
431 with amplified levels of EGFR (referred to wt cells) and cells with rearrangement  
432 of EGFR gene (called  $\Delta$  cells) within a neoplasm. It is found that the total size  
433 of the tumors (after 12 days of orthotopic injection) is much larger if a mixture  
434 of wt and  $\Delta$  cells are injected into one mouse simultaneously than when they are  
435 injected into two mice separately. This finding shows that these two types of cells  
436 cooperate with each other to promote growth of the tumor. The producer ( $\Delta$ )  
437 cells secretes certain factors like Interleukin-6(IL-6) and/or Leukemia inhibitory  
438 factor (LIF), which enhance the proliferation and inhibit apoptosis of tumor  
439 cells [34, 65]. The system composed of wt and  $\Delta$  cells is analogous to the one  
440 considered in the previous sections with IL-6 and/or LIF playing the role of the  
441 public goods. Therefore, we can apply our theory to investigate the consequence  
442 of cooperation between these two cell types in GBM.

443 In the experiment [34], the evolution of the tumor size was measured over  
444 a wide range of conditions. A fixed total number of tumor cells (with differing  
445 fractions of wt and  $\Delta$  cells) are injected into nude mice, and then the increase  
446 in the tumor volume is measured after different periods of time (see the inset  
447 in Fig. 6). Without  $\Delta$  cells, it is difficult for the wt cells to induce tumor in  
448 nude mice, as illustrated by the pink upside down-triangles. However, the  $\Delta$   
449 cell alone gives rise to tumors at a rapid growth rate, as illustrated by the blue  
450 squares in Fig. 6. As long as a small fraction of  $\Delta$  cells is injected into the  
451 mice together with wt cells, fast growing tumors are induced in mice (see the  
452 purple up-triangles in Fig. 6). The tumor grows faster as the fraction of  $\Delta$   
453 cells in the total injected cells increases from 0, 10, 50, to 90% as shown in the  
454 inset of Fig. 6. It is also remarkable that the tumors grow even faster as the  
455 injected cells are composed of 10% wt and 90%  $\Delta$  cells (green spheres) than is

456 the case when 100% of cells are  $\Delta$  cells (blue squares), which again shows that  
457 cooperation between the two cell types leads to enhanced growth rate.

458 The experimental observations [34] can be quantitatively explained by the  
459 theoretical model developed here. By using the three growth curves (0%, 50%,  
460 and 100%  $\Delta$  cells) for the tumors, illustrated in the upper panel of Fig. 6, we  
461 determined all the free parameters needed in the model (see SI for details).  
462 Then, the evolution of the tumor size at differing conditions can be predicted.  
463 The theoretical predictions for the tumor growth at 10%, and 90% of  $\Delta$  cells  
464 agree quantitatively with experimental observations, as shown in the lower panel  
465 of Fig. 6. To further explain the growth curves shown in the inset of Fig. 6,  
466 we plotted the growth rate of tumors as a function of the fraction of  $\Delta$  cells  
467 (see the solid red line in Fig. 7). The growth rates for wt,  $\Delta$  cells in the tumor  
468 are illustrated by dotted and dashed lines in Fig. 7, respectively. From this  
469 figure, it follows that the tumor growth rate increases as the fraction of  $\Delta$  cells  
470 increases, reaching a maximum value in the middle (0.77, marked by the orange  
471 arrow). Subsequently, the rate starts to decrease. This behavior is similar to  
472 the experimental data in the inset of Fig. 6 and is also found for pancreatic  
473 cancer cells, as discussed here and discovered by AFC [35].

474 We also found that the glioblastoma with ITH is quite stable irrespective  
475 of the initial composition (see Fig. S5A). Our results explain the finding that  
476 frequently the wt cells and  $\Delta$  cells coexist in GBM, and provides an explanation  
477 for the poor prognosis due to the quick recovery of the fast growing state as  
478 long as a small fraction  $f_+$  of  $\Delta$  cells is present. Therefore, the stability of  
479 such a heterogeneous tumor needs to be eliminated in order to improve the  
480 survival rates of GBM patients. From the discussion above, it follows that  
481 the supply of exogenous public goods can influence cooperation between two  
482 different populations sharing one public good. By adding exogenous cytokines  
483 to the model (see Eqs. (S.7) and (S.8) in SI), a stable homogeneous system  
484 composed of only wt cells could be reached (see Fig. S5B) irrespective of the  
485 initial fraction of the producer,  $\Delta$  cells. Such a tumor would stop growing after  
486 removal of exogenous cytokines as wt cells alone cannot sustain tumor growth,  
487 as observed in experiments [34]. If practice, this might provide a treatment  
488 strategy for GBM, and perhaps other types of cancers dominated by ITH due  
489 to the interactions among different cancer cells.

## 490 Discussion

491 In this article, we investigated the interactions between two distinct subpopula-  
492 tions frequently observed in many cancers, which is a manifestation of hetero-  
493 geneity. We uncovered a general mechanism for the establishment of a stable  
494 heterogeneous system consisting of producers and non-producer cells as a func-  
495 tion of a number of experimentally controllable parameters. The tragedy of the  
496 commons would be expected as the public goods are shared equally among both  
497 the populations. However, a stable heterogeneous state arises if the producer  
498 can obtain the public goods more efficiently than the non-producer. Most im-

499 portantly, the emergence of these scenarios require the fitness of the two players  
500 must be a non-linear function of the public goods. Otherwise, only an unstable  
501 heterogeneous system can be established. In addition, the cost to benefit ratio is  
502 a critical factor in determining the establishment of a stable coexisting state. In  
503 the experiments [35], the benefit is adjusted by changing the amount of serum  
504 while the cost of public good production is a constant. However, Archetti et  
505 al changed the cost instead of benefit to study the cooperation and competi-  
506 tion of the two types of cells in their model. This is due to the complex payoff  
507 function assumed in the AFC model. In our model, the benefit of public goods  
508 is separated into two parts (endogenous and exogenous) naturally, while the  
509 cost is a constant. Therefore, we can investigate the influence of benefits on  
510 the cell cooperation and competition directly, as realized in experiments. In  
511 addition, our formulation is sufficiently general that we could test the effects of  
512 all other experimentally accessible parameters in order to assess the ranges of  
513 parameters that produce coexistence between producer and non-producer cells,  
514 as illustrated for the specific case in Fig. 5B.

515 We also found that it is relatively easy to establish cooperation and form a  
516 stable diversified or heterogeneous state in harsh conditions than in resource-  
517 abundant conditions. Such a phenomenon is quite common in biological sys-  
518 tems [66, 67]. The price paid by the producers also strongly influences the  
519 cooperation between the two players. Higher price can decrease the demand for  
520 exogenous resources in order to establish cooperation and might also expand  
521 cooperation to a wide parameter range.

522 Frequently in many cancers a minor subclone could support the growth of the  
523 whole tumor consisting of many different subpopulations [25, 26, 27]. It is easy  
524 to detect the genotype of dominant subclones, which would be considered as the  
525 target in later treatments. However, if a minor subclone escapes detection then  
526 it could survive, promoting a faster and more aggressive tumor growth caused by  
527 the competitive release [68]. Therefore, it is essential to learn the composition  
528 of a heterogeneous tumor, and also the interactions among different subclones  
529 before efficacious treatment can be formulated for the patients.

530 For cancers with producer and non-producer cells discussed here, it might  
531 be prudent to feed these cells instead of depriving them of nutrients so that  
532 competition between different subclones is promoted. Then, an effective treat-  
533 ment can be implemented as the system transits from a stable heterogeneous  
534 population to a homogeneous population. We have illustrated this concept us-  
535 ing an experiment involving glioblastoma. This idea is reminiscent of another  
536 concept in cancer therapy, the tumor vasculature normalization [69]. The tu-  
537 mor vasculature is quite abnormal, which leads to heterogeneous tumor blood  
538 flow. Therefore, many tumor cells cannot get access to blood vessels and live  
539 under pressure such as hypoxia and acidosis, thus inducing genome instabil-  
540 ity and high intratumor heterogeneity [70]. Temporal normalization of tumor  
541 vasculature can reduce the microenvironment pressure on tumor cells and also  
542 increase the drug delivery efficiency. Hence, it can increase the conventional  
543 therapy efficacy if both procedures are scheduled carefully [69]. Similarly, the  
544 new idea proposed here could be combined with traditional therapies, such as

545 surgery and chemotherapy, to reduce the risk and drug resistance but increase  
546 the therapy efficacy. In addition, similar public goods dilemma has been ob-  
547 served in many systems, such as microbial colonies, insect communities, and  
548 human society [71, 72, 73]. The mechanism proposed here for the establishment  
549 of a heterogeneous population is quite general, and could in principle be applied  
550 to these systems. It will be most interesting to extend our model to the case  
551 beyond two species, which is more prevalent in nature [74]. It would be fruitful  
552 to consider different mechanisms of ITH in order to account for complex origins  
553 of ITH [12].

#### 554 **SUPPLEMENTAL INFORMATION**

555 Supplemental Information including five figures and detailed methods can be  
556 found with this article online.

557

#### 558 **ACKNOWLEDGMENTS**

559 We are grateful to Abdul N Malmi-Kakkada and Sumit Sinha for discussions  
560 and comments on the manuscript.

561

#### 562 **AUTHOR CONTRIBUTIONS**

563 X. L. and D. T. conceived and designed the project, and co-wrote the paper.  
564 X. L. performed the research.

565

#### 566 **Competing interests**

567 We declare we have no competing interests.

568

#### 569 **Funding**

570 This work is supported by the National Science Foundation (PHY 17-08128  
571 and CHE 16-32756), and the Collie-Welch Chair through the Welch Foundation  
572 (F-0019).

## 573 **References**

- 574 [1] Gerlinger M, McGranahan N, Dewhurst SM, Burrell RA, Tomlinson I,  
575 Swanton C. Cancer: evolution within a lifetime. Annual review of ge-  
576 netics. 2014;48:215–236. (DOI: 10.1146/annurev-genet-120213-092314).
- 577 [2] Nowell PC. The clonal evolution of tumor cell populations. Science.  
578 1976;194(4260):23–28. (DOI: 10.1126/science.959840).
- 579 [3] Vogelstein B, Papadopoulos N, Velculescu VE, Zhou S, Diaz LA, Kinzler  
580 KW. Cancer genome landscapes. Science. 2013;339(6127):1546–1558. (DOI:  
581 10.1126/science.1235122).
- 582 [4] Gerlinger M, Rowan AJ, Horswell S, Larkin J, Endesfelder D, Gronroos E,  
583 et al. Intratumor heterogeneity and branched evolution revealed by multire-



- 584 gion sequencing. *New England journal of medicine*. 2012;366(10):883–892.  
585 (DOI: 10.1056/NEJMoa1113205).
- 586 [5] Sottoriva A, Spiteri I, Piccirillo SG, Touloumis A, Collins VP, Marioni  
587 JC, et al. Intratumor heterogeneity in human glioblastoma reflects cancer  
588 evolutionary dynamics. *Proceedings of the National Academy of Sciences*.  
589 2013;110(10):4009–4014. (DOI: 10.1073/pnas.1219747110).
- 590 [6] Bashashati A, Ha G, Tone A, Ding J, Prentice LM, Roth A, et al. Dis-  
591 tinct evolutionary trajectories of primary high-grade serous ovarian cancers  
592 revealed through spatial mutational profiling. *The Journal of Pathology*.  
593 2013;231(1):21–34. (DOI: 10.1002/path.4230).
- 594 [7] Gerlinger M, Horswell S, Larkin J, Rowan AJ, Salm MP, Varela I, et al. Ge-  
595 nomic architecture and evolution of clear cell renal cell carcinomas defined  
596 by multiregion sequencing. *Nature Genetics*. 2014;46(3):225–233. (DOI:  
597 10.1038/ng.2891).
- 598 [8] de Bruin EC, McGranahan N, Mitter R, Salm M, Wedge DC, Yates L,  
599 et al. Spatial and temporal diversity in genomic instability processes defines  
600 lung cancer evolution. *Science*. 2014;346(6206):251–256. (DOI: 10.1126/sci-  
601 ence.1253462).
- 602 [9] Yates LR, Gerstung M, Knappskog S, Desmedt C, Gundem G, Van Loo  
603 P, et al. Subclonal diversification of primary breast cancer revealed  
604 by multiregion sequencing. *Nature Medicine*. 2015;21(7):751–759. (DOI:  
605 10.1038/nm.3886).
- 606 [10] Boutros PC, Fraser M, Harding NJ, De Borja R, Trudel D, Lalonde E,  
607 et al. Spatial genomic heterogeneity within localized, multifocal prostate  
608 cancer. *Nature genetics*. 2015;47(7):736–745. (DOI: 10.1038/ng.3315).
- 609 [11] Ling S, Hu Z, Yang Z, Yang F, Li Y, Lin P, et al. Extremely  
610 high genetic diversity in a single tumor points to prevalence of non-  
611 Darwinian cell evolution. *Proceedings of the National Academy of Sciences*.  
612 2015;112(47):E6496–E6505. (DOI: 10.1073/pnas.1519556112).
- 613 [12] Almendro V, Marusyk A, Polyak K. Cellular heterogeneity and molecular  
614 evolution in cancer. *Annual Review of Pathology: Mechanisms of Disease*.  
615 2013;8:277–302. (DOI: 10.1146/annurev-pathol-020712-163923).
- 616 [13] Bedard PL, Hansen AR, Ratain MJ, Siu LL. Tumour heterogeneity in the  
617 clinic. *Nature*. 2013;501(7467):355–364. (DOI: 10.1038/nature12627).
- 618 [14] Zhang J, Fujimoto J, Zhang J, Wedge DC, Song X, Zhang J, et al. Intra-  
619 tumor heterogeneity in localized lung adenocarcinomas delineated by mul-  
620 tiregion sequencing. *Science*. 2014;346(6206):256–259. (DOI: 10.1126/sci-  
621 ence.1256930).



- 622 [15] Snuderl M, Fazlollahi L, Le LP, Nitta M, Zhelyazkova BH, David-  
623 son CJ, et al. Mosaic amplification of multiple receptor tyrosine ki-  
624 nase genes in glioblastoma. *Cancer Cell*. 2011;20(6):810–817. (DOI:  
625 10.1016/j.ccr.2011.11.005).
- 626 [16] Szerlip NJ, Pedraza A, Chakravarty D, Azim M, McGuire J, Fang Y,  
627 et al. Intratumoral heterogeneity of receptor tyrosine kinases EGFR and  
628 PDGFRA amplification in glioblastoma defines subpopulations with dis-  
629 tinct growth factor response. *Proceedings of the National Academy of*  
630 *Sciences*. 2012;109(8):3041–3046. (DOI: 10.1073/pnas.1114033109).
- 631 [17] Liotta LA, Kohn EC. The microenvironment of the tumour–host interface.  
632 *Nature*. 2001;411(6835):375–379. (DOI:10.1038/35077241).
- 633 [18] Allinen M, Beroukhi R, Cai L, Brennan C, Lahti-Domenici J, Huang H,  
634 et al. Molecular characterization of the tumor microenvironment in breast  
635 cancer. *Cancer cell*. 2004;6(1):17–32. (DOI: 10.1016/j.ccr.2004.06.010).
- 636 [19] Bhowmick NA, Neilson EG, Moses HL. Stromal fibroblasts in cancer initi-  
637 ation and progression. *Nature*. 2004;432(7015):332–337. (DOI: 10.1038/na-  
638 ture03096).
- 639 [20] Malmi-Kakkada AN, Li X, Samanta HS, Sinha S, Thirumalai D. Cell  
640 growth rate dictates the onset of glass to fluid-like transition and long  
641 time super-diffusion in an evolving cell colony. *Physical Review X*.  
642 2018;8(2):021025. (DOI: 10.1103/PhysRevX.8.021025).
- 643 [21] Cleary AS, Leonard TL, Gestl SA, Gunther EJ. Tumour cell heterogene-  
644 ity maintained by cooperating subclones in Wnt-driven mammary cancers.  
645 *Nature*. 2014;508(7494):113–117. (DOI: 10.1038/nature13187).
- 646 [22] Marusyk A, Tabassum DP, Altrock PM, Almendro V, Michor F, Polyak  
647 K. Non-cell-autonomous driving of tumour growth supports sub-clonal  
648 heterogeneity. *Nature*. 2014;514(7520):54–58. (DOI: 10.1038/nature13556).
- 649 [23] Chapman A, del Ama LF, Ferguson J, Kamarashev J, Wellbrock C, Hurl-  
650 stone A. Heterogeneous tumor subpopulations cooperate to drive invasion.  
651 *Cell reports*. 2014;8(3):688–695. (DOI: 10.1016/j.celrep.2014.06.045).
- 652 [24] Aceto N, Bardia A, Miyamoto DT, Donaldson MC, Wittner BS, Spencer  
653 JA, et al. Circulating tumor cell clusters are oligoclonal precur-  
654 sors of breast cancer metastasis. *Cell*. 2014;158(5):1110–1122. (DOI:  
655 10.1016/j.cell.2014.07.013).
- 656 [25] Mullighan CG, Phillips LA, Su X, Ma J, Miller CB, Shurtleff SA, et al.  
657 Genomic analysis of the clonal origins of relapsed acute lymphoblas-  
658 tic leukemia. *Science*. 2008;322(5906):1377–1380. (DOI: 10.1126/sci-  
659 ence.1164266).

- 660 [26] Johnson BE, Mazor T, Hong C, Barnes M, Aihara K, McLean CY, et al.  
661 Mutational analysis reveals the origin and therapy-driven evolution of  
662 recurrent glioma. *Science*. 2014;343(6167):189–193. (DOI: 10.1126/sci-  
663 ence.1239947).
- 664 [27] Morrissy AS, Garzia L, Shih DJ, Zuyderduyn S, Huang X, Skowron P,  
665 et al. Divergent clonal selection dominates medulloblastoma at recurrence.  
666 *Nature*. 2016;529(7586):351–357. (DOI: 10.1038/nature16478).
- 667 [28] Boucher DH, James S, Keeler KH. The ecology of mutualism. *Annual Re-  
668 view of Ecology and Systematics*. 1982;13(1):315–347. (DOI: 10.1146/an-  
669 nurev.es.13.110182.001531).
- 670 [29] Menon R, Korolev KS. Public good diffusion limits microbial mutual-  
671 ism. *Physical review letters*. 2015;114(16):168102. (DOI: 10.1103/Phys-  
672 RevLett.114.168102).
- 673 [30] Zhou X, Franklin RA, Adler M, Jacox JB, Bailis W, Shyer JA, et al. Circuit  
674 design features of a stable two-cell system. *Cell*. 2018;172(4):744–757. (DOI:  
675 10.1016/j.cell.2018.01.015).
- 676 [31] Wang RW, Sun BF, Zheng Q, Shi L, Zhu L. Asymmetric interaction and  
677 indeterminate fitness correlation between cooperative partners in the fig–fig  
678 wasp mutualism. *Journal of the Royal Society Interface*. 2011;8(63):1487–  
679 1496, (DOI: 10.1098/rsif.2011.0063).
- 680 [32] Axelrod R, Axelrod DE, Pienta KJ. Evolution of cooperation among  
681 tumor cells. *Proceedings of the National Academy of Sciences*.  
682 2006;103(36):13474–13479. (DOI: 10.1073/pnas.0606053103).
- 683 [33] Merlo LM, Pepper JW, Reid BJ, Maley CC. Cancer as an evolutionary  
684 and ecological process. *Nature Reviews Cancer*. 2006;6(12):924–935. (DOI:  
685 10.1038/nrc2013).
- 686 [34] Maria-del Mar I, Bonavia R, Mukasa A, Narita Y, Sah DW, Vandenberg  
687 S, et al. Tumor heterogeneity is an active process maintained by a mutant  
688 EGFR-induced cytokine circuit in glioblastoma. *Genes and Development*.  
689 2010;24(16):1731–1745. (DOI: 10.1101/gad.1890510).
- 690 [35] Archetti M, Ferraro DA, Christofori G. Heterogeneity for IGF-II production  
691 maintained by public goods dynamics in neuroendocrine pancreatic cancer.  
692 *Proceedings of the National Academy of Sciences*. 2015;112(6):1833–1838.  
693 (DOI: 10.1073/pnas.1414653112).
- 694 [36] Hofbauer J, Sigmund K. *Evolutionary games and population dynamics*.  
695 Cambridge university press; 1998.
- 696 [37] Hauert C, Holmes M, Doebeli M. Evolutionary games and population  
697 dynamics: maintenance of cooperation in public goods games. *Proceedings  
698 of the Royal Society of London B: Biological Sciences*. 2006;273(1600):2565–  
699 2570. (DOI: 10.1098/rspb.2006.3600).

- 700 [38] Nowak MA. Five rules for the evolution of cooperation. *Science*.  
701 2006;314(5805):1560–1563. (DOI: 10.1126/science.1133755).
- 702 [39] Allen B, Gore J, Nowak MA. Spatial dilemmas of diffusible public goods.  
703 *Elife*. 2013;2:e01169. (DOI: 10.7554/eLife.01169).
- 704 [40] Nanda M, Durrett R. Spatial evolutionary games with weak selection.  
705 *Proceedings of the National Academy of Sciences*. 2017;114(23):6046–6051.  
706 (DOI: 10.1073/pnas.1620852114).
- 707 [41] Bauer M, Frey E. Multiple scales in metapopulations of public goods  
708 producers. *Physical Review E*. 2018;97(4):042307. (DOI: 10.1103/Phys-  
709 RevE.97.042307).
- 710 [42] Blythe RA, McKane AJ. Stochastic models of evolution in genetics, ecology  
711 and linguistics. *Journal of Statistical Mechanics: Theory and Experiment*.  
712 2007;2007(07):P07018. (DOI: 10.1088/1742–5468/2007/07/P07018).
- 713 [43] Melbinger A, Cremer J, Frey E. Evolutionary game theory in growing  
714 populations. *Physical Review Letters*. 2010;105(17):178101. (DOI:  
715 10.1103/PhysRevLett.105.178101).
- 716 [44] Hardin G. The tragedy of the commons. *Science*. 1968;162(3859):1243–  
717 1248. (DOI: 10.1126/science.162.3859.1243).
- 718 [45] Chesson P. Mechanisms of maintenance of species diversity. *Annual re-  
719 view of Ecology and Systematics*. 2000;31(1):343–366. (DOI: 10.1146/an-  
720 nurev.ecolsys.31.1.343).
- 721 [46] Hauert C, Michor F, Nowak MA, Doebeli M. Synergy and discounting  
722 of cooperation in social dilemmas. *Journal of theoretical biology*.  
723 2006;239(2):195–202. (DOI: 10.1016/j.jtbi.2005.08.040).
- 724 [47] Archetti M. Dynamics of growth factor production in monolayers of can-  
725 cer cells and evolution of resistance to anticancer therapies. *Evolutionary  
726 applications*. 2013;6(8):1146–1159. (DOI: 10.1111/eva.12092).
- 727 [48] Kimmel GJ, Gerlee P, Brown JS, Altrock PM. Neighborhood size-  
728 effects in nonlinear public goods games. *bioRxiv*. 2018;p. 347401. (DOI:  
729 10.1101/347401).
- 730 [49] Christofori G, Naik P, Hanahan D. A second signal supplied by  
731 insulin-like growth factor II in oncogene-induced tumorigenesis. *Nature*.  
732 1994;369(6479):414–418. (DOI: 10.1038/369414a0).
- 733 [50] Pollak M. Insulin and insulin-like growth factor signalling in neoplasia.  
734 *Nature Reviews Cancer*. 2008;8(12):915–928. (DOI: 10.1038/nrc2536).
- 735 [51] Gerlee P, Altrock PM. Complexity and stability in growing cancer  
736 cell populations. *Proceedings of the National Academy of Sciences*.  
737 2015;112(21):E2742–E2743. (DOI: 10.1073/pnas.1505115112).

- 738 [52] Ayala FJ, Campbell CA. Frequency-dependent selection. Annual re-  
739 view of Ecology and systematics. 1974;5(1):115–138. (DOI: 10.1146/an-  
740 nurev.es.05.110174.000555).
- 741 [53] Harris AL. Hypoxia—a key regulatory factor in tumour growth. Nature  
742 Reviews Cancer. 2002;2(1):38–47. (DOI: 10.1038/nrc704).
- 743 [54] Kato Y, Ozawa S, Miyamoto C, Maehata Y, Suzuki A, Maeda T, et al.  
744 Acidic extracellular microenvironment and cancer. Cancer Cell Interna-  
745 tional. 2013;13(1):89. (DOI: 10.1186/1475–2867–13–89).
- 746 [55] Gupta GP, Massagué J. Cancer metastasis: building a framework. Cell.  
747 2006;127(4):679–695. (DOI: 10.1016/j.cell.2006.11.001).
- 748 [56] Gallego O. Nonsurgical treatment of recurrent glioblastoma. Current on-  
749 cology. 2015;22(4):e273–281. (DOI: 10.3747/co.22.2436).
- 750 [57] Jung V, Romeike BF, Henn W, Feiden W, Moringlane JR, Zang KD,  
751 et al. Evidence of focal genetic microheterogeneity in glioblastoma mul-  
752 tiforme by area-specific CGH on microdissected tumor cells. Journal of  
753 Neuropathology and Experimental Neurology. 1999;58(9):993–999. (DOI:  
754 10.1097/00005072–199909000–00009).
- 755 [58] Bonavia R, Cavenee WK, Furnari FB, et al. Heterogeneity maintenance in  
756 glioblastoma: a social network. Cancer Research. 2011;71(12):4055–4060.  
757 (DOI: 10.1158/0008–5472.CAN–11–0153).
- 758 [59] Hurt MR, Moossy J, Donovan-Peluso M, Locker J. Amplification of epider-  
759 mal growth factor receptor gene in gliomas: histopathology and prognosis.  
760 Journal of Neuropathology and Experimental Neurology. 1992;51(1):84–90.  
761 (DOI: 10.1097/00005072–199201000–00010).
- 762 [60] Jaros E, Perry R, Adam L, Kelly P, Crawford P, Kalbag R, et al. Prognostic  
763 implications of p53 protein, epidermal growth factor receptor, and Ki-67  
764 labelling in brain tumours. British Journal of Cancer. 1992;66(2):373–385.  
765 (DOI: 10.1038/bjc.1992.273).
- 766 [61] Schlegel J, Merdes A, Stumm G, Albert FK, Forsting M, Hynes N, et al.  
767 Amplification of the epidermal-growth-factor-receptor gene correlates with  
768 different growth behaviour in human glioblastoma. International Journal  
769 of Cancer. 1994;56(1):72–77. (DOI: 10.1002/ijc.2910560114 ).
- 770 [62] Nishikawa R, Ji XD, Harmon RC, Lazar CS, Gill GN, Cavenee WK, et al. A  
771 mutant epidermal growth factor receptor common in human glioma confers  
772 enhanced tumorigenicity. Proceedings of the National Academy of Sciences.  
773 1994;91(16):7727–7731. (DOI: 10.1073/pnas.91.16.7727).
- 774 [63] Shinojima N, Tada K, Shiraishi S, Kamiryo T, Kochi M, Nakamura H,  
775 et al. Prognostic value of epidermal growth factor receptor in patients with  
776 glioblastoma multiforme. Cancer Research. 2003;63(20):6962–6970.

- 777 [64] Heimberger AB, Hlatky R, Suki D, Yang D, Weinberg J, Gilbert  
778 M, et al. Prognostic effect of epidermal growth factor receptor and  
779 EGFRvIII in glioblastoma multiforme patients. *Clinical Cancer Research*.  
780 2005;11(4):1462–1466. (DOI: 10.1158/1078-0432.CCR-04-1737).
- 781 [65] Heinrich PC, Behrmann I, Serge H, Hermanns HM, Müller-Newen  
782 G, Schaper F. Principles of interleukin (IL)-6-type cytokine sig-  
783 nalling and its regulation. *Biochemical Journal*. 2003;374(1):1–20. (DOI:  
784 10.1042/BJ20030407).
- 785 [66] Korolev KS, Xavier JB, Gore J. Turning ecology and evolution against cancer.  
786 *Nature Reviews Cancer*. 2014;14(5):371–380. (DOI: 10.1038/nrc3712).
- 787 [67] Hoek TA, Axelrod K, Biancalani T, Yurtsev EA, Liu J, Gore J. Resource  
788 availability modulates the cooperative and competitive nature of a micro-  
789 bial cross-feeding mutualism. *PLoS Biology*. 2016;14(8):e1002540. (DOI:  
790 10.1371/journal.pbio.1002540).
- 791 [68] Greaves M, Maley CC. Clonal evolution in cancer. *Nature*.  
792 2012;481(7381):306–313. (DOI: 10.1038/nature10762).
- 793 [69] Jain RK. Normalization of tumor vasculature: an emerging concept in  
794 antiangiogenic therapy. *Science*. 2005;307(5706):58–62. (DOI: 10.1126/sci-  
795 ence.1104819).
- 796 [70] Bristow RG, Hill RP. Hypoxia and metabolism: hypoxia, DNA repair  
797 and genetic instability. *Nature Reviews Cancer*. 2008;8(3):180–192. (DOI:  
798 10.1038/nrc2344).
- 799 [71] Dobata S, Tsuji K. Public goods dilemma in asexual ant societies. *Pro-  
800 ceedings of the National Academy of Sciences*. 2013;110(40):16056–16060.  
801 (DOI: 10.1073/pnas.1309010110).
- 802 [72] Drescher K, Nadell CD, Stone HA, Wingreen NS, Bassler BL. Solu-  
803 tions to the public goods dilemma in bacterial biofilms. *Current Biology*.  
804 2014;24(1):50–55. (DOI: 10.1016/j.cub.2013.10.030).
- 805 [73] Kaul I, Grungberg I, Stern MA. *Global Public Goods: International Co-  
806 operation in the 21st Century*. Oxford University Press New York; 1999.
- 807 [74] Levine JM, Bascompte J, Adler PB, Allesina S. Beyond pairwise  
808 mechanisms of species coexistence in complex communities. *Nature*.  
809 2017;546(7656):56–64. (DOI: 10.1038/nature22898).

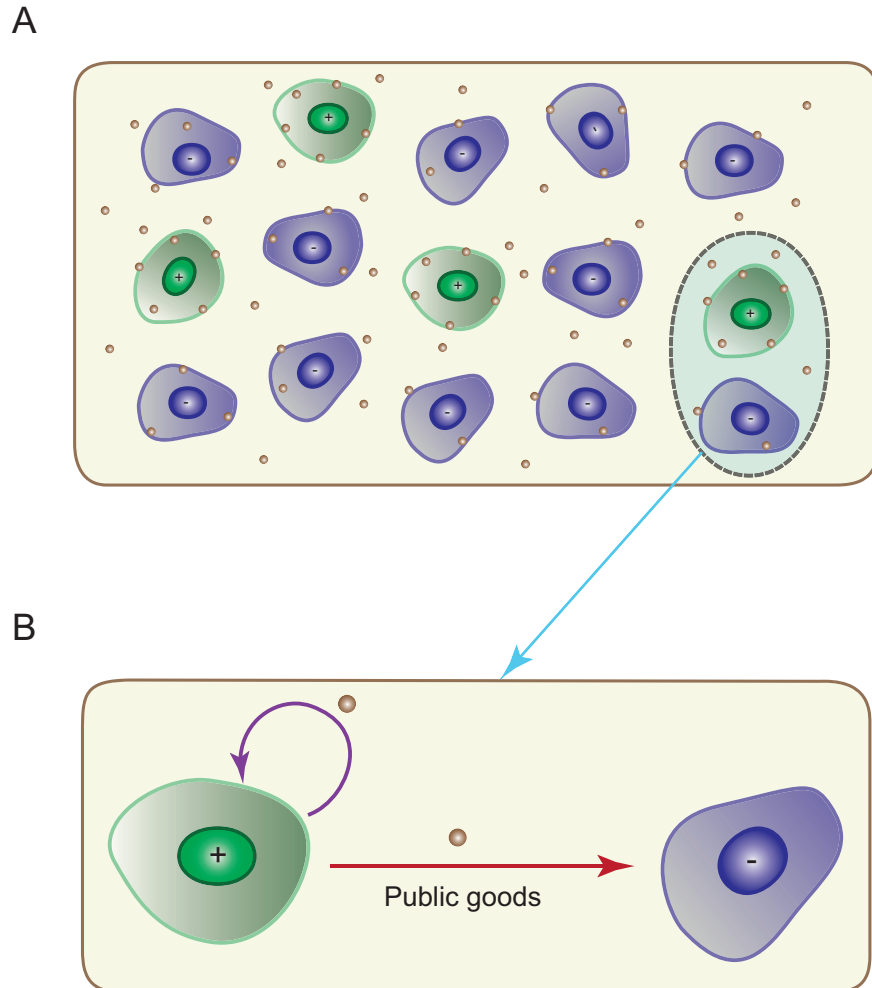

Figure 1: **Illustration of public goods game.** (A) The public goods (small brown circles) generated by producers (“+” agents in green) are shared unequally between producers and non-producers (“-” agents in blue color). Both producers and non-producers benefit from the presence of the public goods, which promote proliferation or survival of these agents. The public goods can also be supplied from exogenous resources. (B) A zoom-in of the dashed line oval in Fig. 1A to illustrate the public goods dependent circuit for the producer and non-producer. Coexistence of the two cell types requires feedback (purple line) and unequal sharing of the public goods.

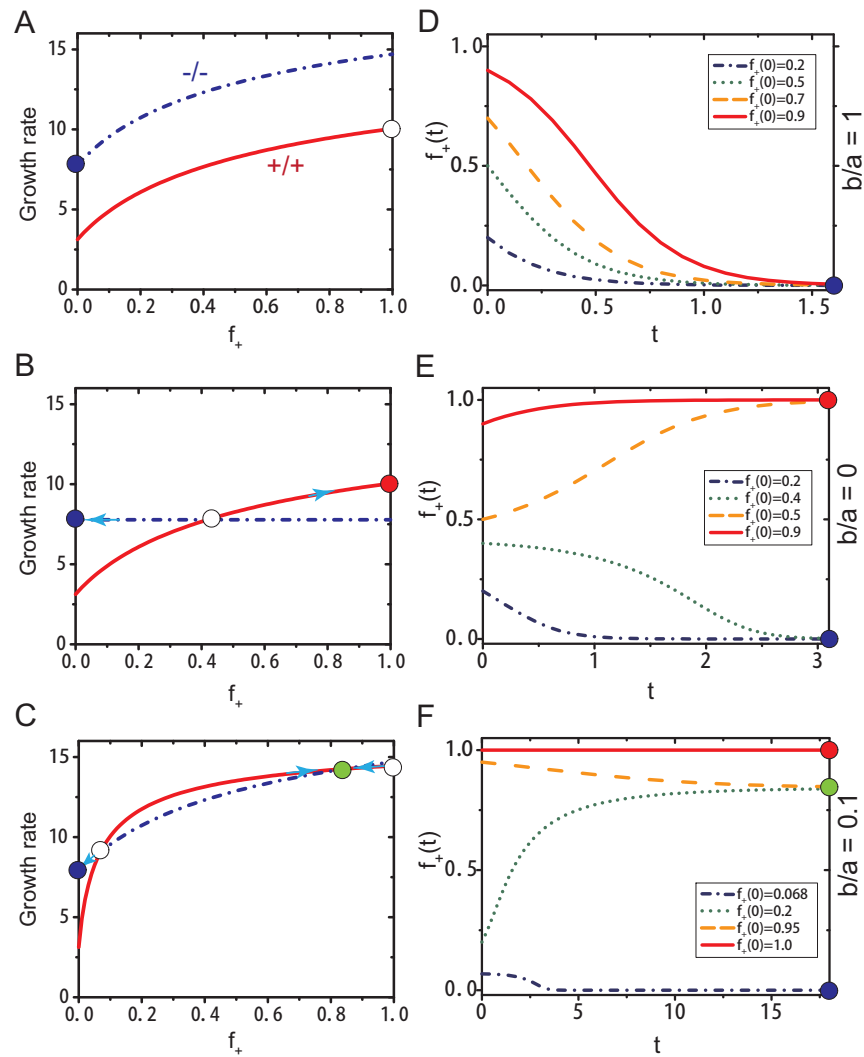

Figure 2: (A)-(C): Growth rates of  $+/+$  and  $-/-$  cells as a function of the fraction ( $f_+$ ) of  $+/+$  cells under different allocation of IGF-II produced by the  $+/+$  cells. (A) Equal share of IGF-II ( $b = a = 8$ ), (B) no share ( $b = 0$ , and  $a = 8$ ), (C) a small portion ( $b = 8$ , and  $a = 80$ ) is allocated to  $-/-$  cells. The value of  $c_0 = 1$  and  $p_0 = 4.65$  in Eq. (12) are derived from fitting the equilibrium fractions of  $+/+$  cells observed in experiments using our model. The growth rate of  $+/+$  cells are shown in solid red lines while dash-dotted blue lines describe the growth rate of  $-/-$  cells. The filled and empty circles indicate a stable or unstable fixed point, respectively. A stable state consisting of only  $+/+$  ( $-/-$ ) cells is indicated in red (blue) color. The green filled circle shows a stable heterogeneous state representing coexistence of the two cell types. (D)-(F): The evolution of  $f_+(t)$  at different  $f_+(t=0)$  values corresponding to the allocation strategies of IGF-II in (A)-(C). Each row represents results from one of the three allocation strategies. The growth rate is defined as the relative density change of cells during the log phase [35]. The unit for time is days.



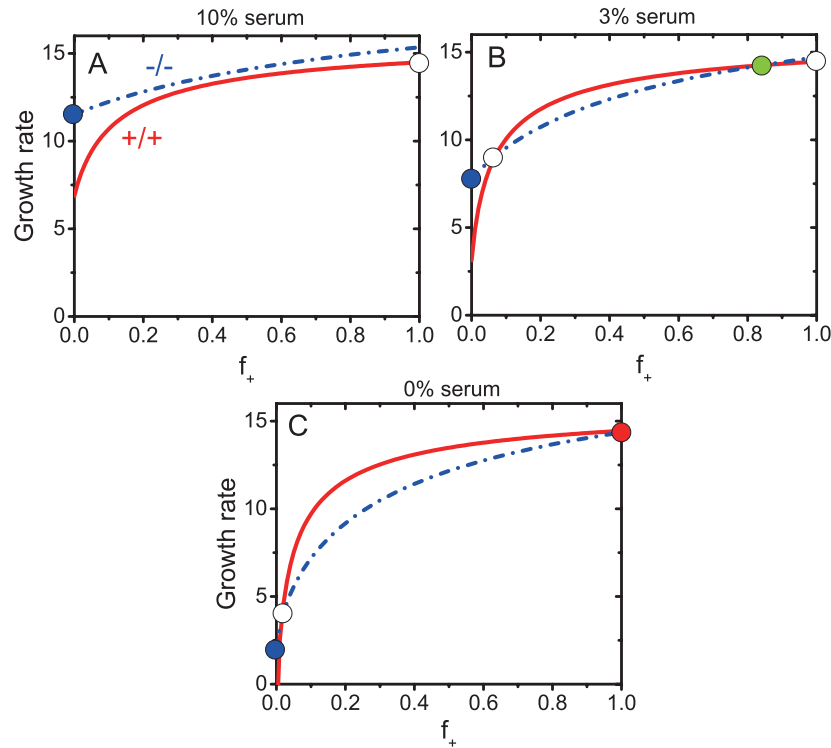

Figure 3: Growth rates of +/+ and -/- cells as a function of the fraction ( $f_+$ ) of +/+ cells at different levels of exogenous resources (serum). (A)  $c_0 = 3.3$  corresponds to 10% serum in experiments; (B)  $c_0 = 1$  represents 3% serum; (C)  $c_0 = 0$  implies absence of serum. The value of  $a = 80$ ,  $b = 8$ , and  $p_0 = 4.65$ , corresponding to the parameters in Fig. 2C. The flow diagram in Fig. 3B corresponds to Fig. 2C. The meaning of the symbols used and the definition of growth rate are the same as in Fig. 2.

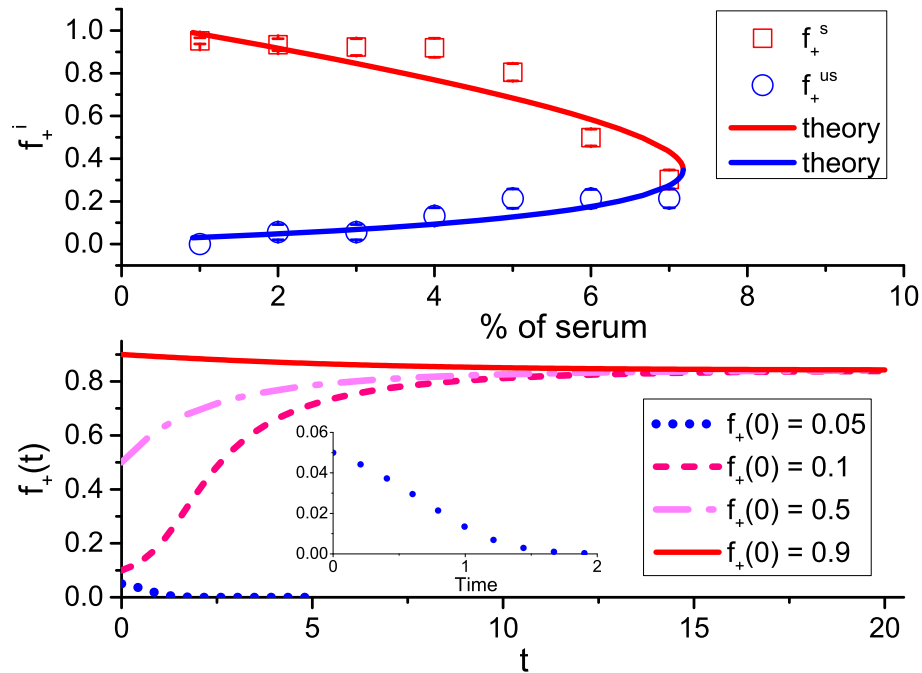

Figure 4: Upper panel: The internal equilibrium fractions ( $f_+^i$ ,  $i \equiv s$  or  $us$ , with  $s$  for stable and  $us$  for unstable state) of  $+/+$  cells as a function of serum levels. Stable states are shown by red squares while blue circles indicate unstable states. The upper and lower bounds represent the upper and lower boundaries for the equilibrium fractions observed in experiments and the symbols give the middle value of these two boundaries. The solid lines correspond to theoretical predictions using  $a = 80$ , and  $p_0 = 4.65$  in Eqs. (12) and (13). Lower panel: Theoretical predictions for the time-dependent changes in the fraction  $f_+(t)$  of  $+/+$  cells for various initial conditions ( $f_+(0) = 0.05, 0.1, 0.5, 0.9$ ) in the presence of 3% of serum. The inset figure shows the evolution of the fraction of  $+/+$  cell with  $f_+(0) = 0.05$ . The unit for time is days.

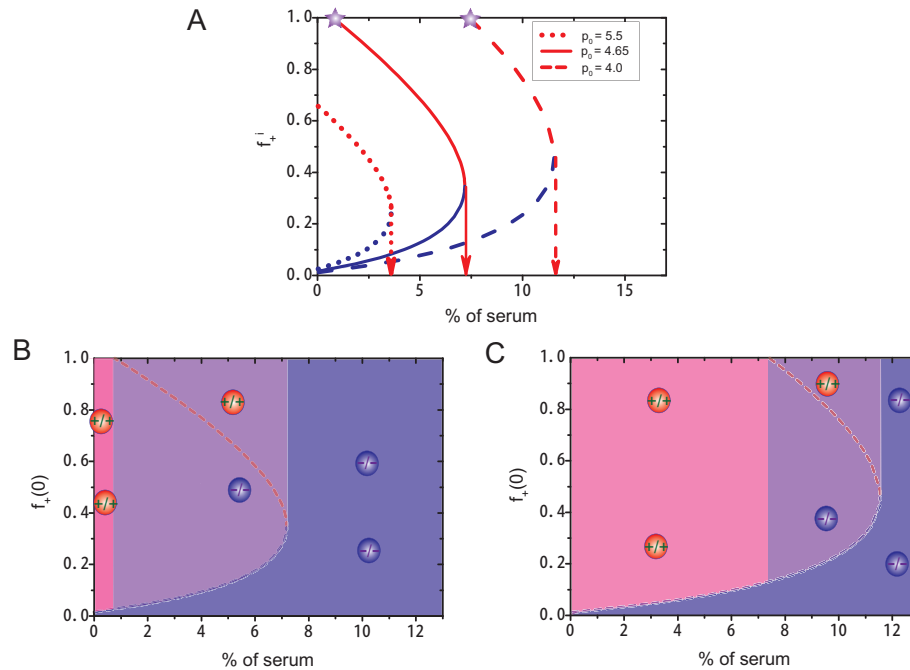

Figure 5: (A) The internal equilibrium fractions ( $f_+^i$ ,  $i \equiv s, us$ ) of producers as a function of the levels of serum for different  $p_0$  values. The fraction ( $f_+^s$ ) at stable equilibrium are shown in red color while blue color indicates unstable equilibrium fractions ( $f_+^{us}$ ). Arrows give the critical level of serum above which only non-producers exist. Purple stars represent the lowest level of serum at which producers and non-producers coexist in a stable equilibrium state. (B) and (C) Phase diagrams (initial fraction  $f_+(0)$  vs % of serum) with  $p_0 = 4.65$  and  $p_0 = 4.00$ , respectively. Three stable phases are shown in these two figures. i) A homogeneous phase consisting of only producers (pink color). ii) A heterogeneous phase consisting of both producers and non-producers (purple color). The stable equilibrium fraction of producers is indicated by the dashed red line. iii) A homogeneous phase with of only non-producers (blue color). The red and blue circles represent the producer and non-producer cells, respectively. Remarkably, for both  $p_0$  values  $+/+$  and  $-/-$  cells coexist in a narrow range of % of serum.

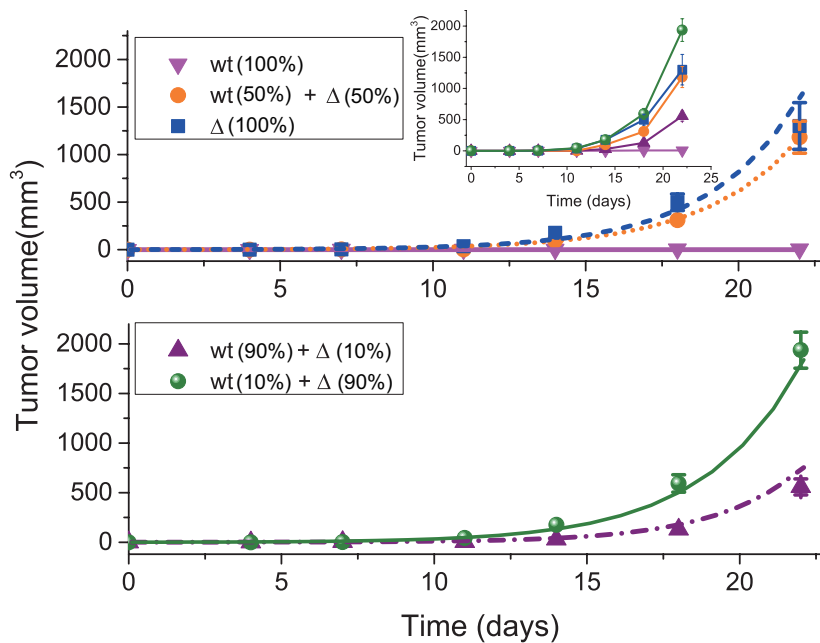

Figure 6: The evolution of tumor size as a function of time (in days) in glioblastoma with only wt cells, mutated  $\Delta$  cells, or mixture of these two types of cells (wt +  $\Delta$ ) injected into nude mice. The symbols represent experimental data. The parameter values ( $a = 68.4$ ,  $b = 0.946$  and  $p_0 = 0.651$ ) in the model are obtained by fitting the theory to experimental data (details in the SI) with 100% wt, 100%  $\Delta$  and 50% for each type of cells (upper panel). Lower panel: The purple and green curves are theoretical predictions with 10%, and 90% of  $\Delta$  cells, which both agree quantitatively with experimental observations. Error bars represent the standard error of the mean in experiments. The complete experimental data are shown in the inset (the labels are the same as in the main figure).

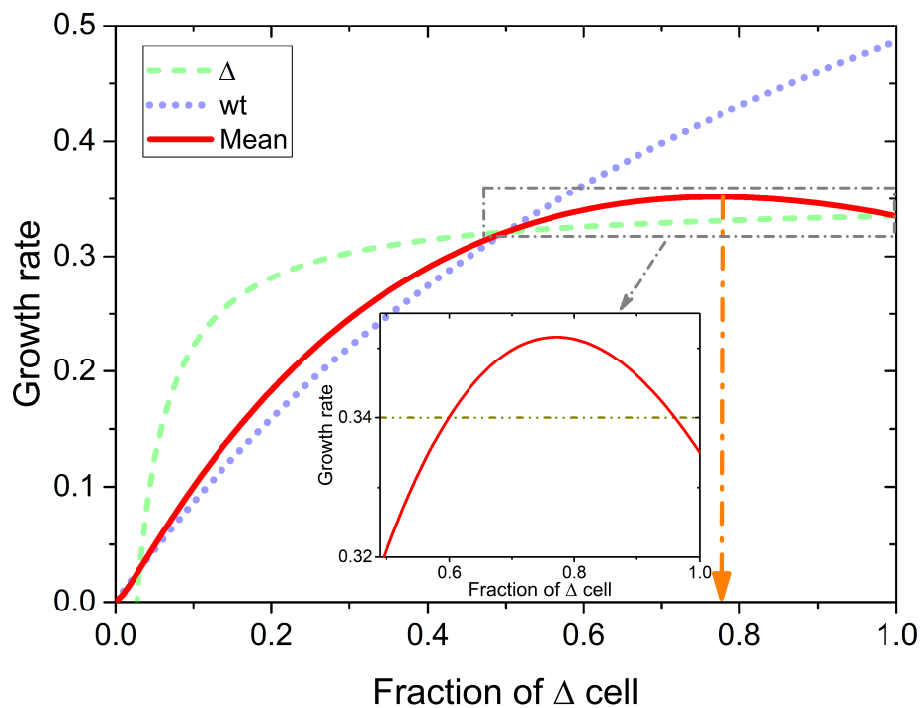

Figure 7: Predictions of the mean growth rate of the GBM tumor cells as a function of the fraction of the  $\Delta$  cell. The green dashed line gives the growth rate of  $\Delta$  cells, and the purple dotted line shows the rate of wt cells. The average growth rate of the whole population with both types of cells are given by solid red line. A maximum is observed at a value  $f_+ \approx 0.77$  (the orange arrow). The inset shows a zoom-in of the dash-dotted line rectangle. The values for the parameters  $a, b$ , and  $p_0$  in this figure are the same as the ones used in Fig. 6. The unit for growth rate is  $\text{day}^{-1}$ .
